# Supplementary material for: Comprehensive Transcriptomic and Metabolomic Analysis of the Litopenaeus vannamei Hepatopancreas After WSSV Challenge
Source: Front Immunol. 2022 Feb 10;13:826794. doi: 10.3389/fimmu.2022.826794 (PMC8867067; doi:10.3389/fimmu.2022.826794)
Supplement: Supplementary file 13 [file Table_11.xlsx]

## Sheet: Table S11
Table S11 Description of the unique DEGs in the N vs P2 group
Gene_id	Gene_description
gene10023	-
gene1005	cytochrome P450 4C1-like, transcript variant X2
gene1016	poly(U)-specific endoribonuclease-like
gene10257	SLAIN motif-containing protein 2-like, transcript variant X1
gene10276	N-acetylgalactosamine-6-sulfatase-like
gene10278	holotricin-3-like, transcript variant X1
gene10337	keratin, type I cytoskeletal 9-like, transcript variant X1
gene10338	cytochrome P450 6k1-like
gene10355	uncharacterized LOC113810982, transcript variant X1
gene10529	proton-coupled folate transporter-like
gene10535	uncharacterized LOC113811190, transcript variant X1
gene10582	uncharacterized LOC113811242
gene10605	uncharacterized LOC113811262
gene10716	uncharacterized LOC113811385
gene10717	tRNA-splicing endonuclease subunit Sen54-like
gene10826	2-amino-1-hydroxyethylphosphonate dioxygenase (glycine-forming)-like
gene10840	uncharacterized LOC113811520
gene10841	-
gene10842	uncharacterized LOC113811526
gene10854	elongation factor 2-like
gene10950	phosphoacetylglucosamine mutase-like
gene10955	TAR DNA-binding protein 43-like
gene1106	canalicular multispecific organic anion transporter 2-like
gene11189	uncharacterized LOC113811913
gene11190	uncharacterized LOC113811914
gene11196	peritrophin-1-like
gene11244	uncharacterized LOC113811968
gene11428	organic cation transporter protein-like
gene11762	xaa-Pro aminopeptidase 1-like
gene11852	oplophorus-luciferin 2-monooxygenase non-catalytic subunit-like
gene11885	neurogenic locus notch homolog protein 2-like
gene11910	uncharacterized LOC113812712
gene12015	protein obstructor-E-like, transcript variant X2
gene12145	homeobox protein CDX-1-like
gene12182	actin, cytoplasmic A3a-like
gene1225	cytochrome P450 18a1-like
gene12380	PQ-loop repeat-containing protein 3-like
gene12404	peritrophin-1-like
gene12407	peritrophin-48-like
gene12419	equilibrative nucleoside transporter 1-like
gene12455	zinc finger protein ush-like
gene12487	uncharacterized LOC113813372
gene12595	homeobox protein homothorax-like, transcript variant X2
gene12645	uncharacterized LOC113813540, transcript variant X1
gene12672	high choriolytic enzyme 1-like, transcript variant X1
gene12867	uncharacterized LOC113813775
gene12868	uncharacterized LOC113813778
gene1306	uncharacterized LOC113814047
gene13237	-
gene13253	1-aminocyclopropane-1-carboxylate synthase-like protein 1
gene13291	uncharacterized LOC113814249
gene13301	exportin-1-like
gene13310	pituitary homeobox x-like
gene1335	uncharacterized LOC113814269
gene13407	uncharacterized LOC113814379
gene13423	esterase E4-like
gene13505	retinol dehydrogenase 14-like
gene13539	protein obstructor-E-like
gene13540	protein obstructor-E-like, transcript variant X1
gene13600	cytochrome P450 2L1-like
gene1381	glutamic acid-rich protein-like
gene13813	uncharacterized LOC113814822
gene13859	zinc finger protein 888-like
gene13918	uncharacterized LOC113814955
gene14076	actin, muscle-like, transcript variant X1
gene14079	actin, muscle-like
gene14082	actin, muscle-like
gene14091	actin-like
gene14092	-
gene14190	metallothionein-1-like
gene14276	cell wall integrity and stress response component 2-like
gene14278	uncharacterized protein DDB_G0271670-like
gene14472	2-oxo-4-hydroxy-4-carboxy-5-ureidoimidazoline decarboxylase-like
gene14648	poly [ADP-ribose] polymerase 3-like
gene1469	large subunit ribosomal RNA
gene14726	uncharacterized LOC113815846, transcript variant X2
gene14871	heat shock protein 60A-like
gene14879	uncharacterized LOC113815999
gene14980	uncharacterized LOC113816146
gene14983	uncharacterized LOC113816150
gene14988	galactoside 2-alpha-L-fucosyltransferase 2-like
gene14996	actin-like
gene1502	-
gene15024	cytochrome P450 2L1-like
gene15029	-
gene15038	uncharacterized protein CG10915-like, transcript variant X1
gene1508	-
gene15140	xanthine dehydrogenase-like
gene15240	mucin-5AC-like
gene15294	calcium-independent phospholipase A2-gamma-like
gene15313	-
gene15396	zinc finger protein 594-like
gene15439	deoxynucleoside triphosphate triphosphohydrolase SAMHD1-like
gene15828	putative mediator of RNA polymerase II transcription subunit 26
gene16027	uncharacterized LOC113817318
gene16190	poly(U)-specific endoribonuclease-like
gene16324	-
gene16348	uncharacterized LOC113817662
gene16349	ERAD-associated E3 ubiquitin-protein ligase HRD1-like
gene16404	alpha-amylase 1-like
gene16421	neural cell adhesion molecule 1-like, transcript variant X1
gene16450	pancreatic triacylglycerol lipase-like
gene16519	peroxisomal sarcosine oxidase-like
gene16570	protein FAM210A-like
gene16582	-
gene16584	OTU domain-containing protein 5-like
gene16656	uncharacterized LOC113818003
gene1669	nascent polypeptide-associated complex subunit alpha, muscle-specific form-like
gene16948	O-acyltransferase like protein-like
gene16984	calcium-binding protein P-like
gene17078	nose resistant to fluoxetine protein 6-like
gene17125	uncharacterized serine-rich protein C215.13-like
gene17150	-
gene17259	uncharacterized LOC113818677
gene17303	inositol-trisphosphate 3-kinase homolog
gene17358	uncharacterized LOC113818787
gene17369	uncharacterized LOC113818807
gene17446	suppressor protein of bem1/bed5 double mutants-like
gene17538	glutaminase liver isoform, mitochondrial-like
gene17546	mitochondrial amidoxime-reducing component 1-like
gene17638	putative protein TPRXL
gene17676	neurofilament medium polypeptide-like, transcript variant X1
gene17759	actin-like
gene17764	-
gene17842	E3 ubiquitin-protein ligase RNF34-like, transcript variant X3
gene1787	fatty acid binding protein 1-B.1-like
gene17917	uncharacterized LOC113819425
gene18084	uncharacterized LOC113819607
gene18141	alanine--glyoxylate aminotransferase 2, mitochondrial-like
gene18163	uncharacterized LOC113819696
gene18228	uncharacterized LOC113819769
gene18310	uncharacterized LOC113819856, transcript variant X1
gene18316	uncharacterized LOC113819861
gene1834	neuronal acetylcholine receptor subunit alpha-6-like
gene18375	xaa-Pro dipeptidase-like
gene18397	nuclear polyadenylated RNA-binding protein 3-like
gene18399	D-beta-hydroxybutyrate dehydrogenase, mitochondrial-like
gene18403	uncharacterized LOC113819941
gene18496	uncharacterized LOC113820068
gene18579	chorion peroxidase-like
gene18611	FMRFamide-related neuropeptides-like
gene18673	uncharacterized LOC113820253
gene18698	uncharacterized LOC113820278
gene18739	eukaryotic translation initiation factor eIF1-like
gene18876	uncharacterized LOC113820470, transcript variant X1
gene18895	pyruvate dehydrogenase (acetyl-transferring) kinase, mitochondrial-like, transcript variant X1
gene18908	-
gene18919	facilitated trehalose transporter Tret1-like, transcript variant X1
gene19025	LON peptidase N-terminal domain and RING finger protein 3-like
gene19067	uncharacterized LOC113820681
gene19202	deoxynucleoside triphosphate triphosphohydrolase SAMHD1-like
gene19317	uncharacterized LOC113820966
gene19328	cytochrome P450 6k1-like
gene19341	multidrug resistance protein 1-like
gene1940	uncharacterized LOC113821003
gene1945	serine protease inhibitor dipetalogastin-like
gene19483	sarcosine dehydrogenase, mitochondrial-like, transcript variant X1
gene19484	sarcosine dehydrogenase, mitochondrial-like
gene19540	uncharacterized LOC113821215
gene19562	nucleoplasmin-like protein ANO39
gene19569	xanthine dehydrogenase/oxidase-like
gene19573	indole-3-acetaldehyde oxidase-like
gene19691	piggyBac transposable element-derived protein 3-like
gene1973	glutathione S-transferase 1-like
gene1974	uncharacterized LOC113821256
gene19764	inter-alpha-trypsin inhibitor heavy chain H3-like
gene19833	glucosylceramidase-like
gene19835	-
gene1987	beta-1,3-galactosyltransferase 5-like
gene19939	uncharacterized LOC113821675
gene19948	aldose reductase-like
gene19997	uncharacterized LOC113821725
gene20027	uncharacterized LOC113821752, transcript variant X1
gene2023	short-chain dehydrogenase/reductase family 9C member 7-like
gene20320	trypsin-1-like
gene20356	uncharacterized LOC113822122
gene20384	uncharacterized LOC113822180
gene20457	cell surface glycoprotein 1-like
gene20466	protein CREBRF homolog, transcript variant X3
gene2057	stearoyl-CoA desaturase 5-like
gene20591	uncharacterized LOC113822378
gene20620	uncharacterized LOC113822415
gene20649	rho-related BTB domain-containing protein 1-like
gene20683	uncharacterized LOC113822485
gene20771	Krueppel homolog 1-like
gene20781	dnaJ homolog subfamily B member 4-like
gene2079	uncharacterized LOC113822474
gene2081	O-acyltransferase like protein-like
gene20849	uncharacterized LOC113822665
gene2093	fibrinogen C domain-containing protein 1-like, transcript variant X1
gene20946	alpha-2-macroglobulin-like protein 1
gene20991	uncharacterized LOC113822819, transcript variant X1
gene20996	glycine-rich cell wall structural protein-like, transcript variant X1
gene21075	uncharacterized LOC113822916
gene21092	protein O-GlcNAcase-like, transcript variant X2
gene2111	cytochrome P450 9e2-like, transcript variant X1
gene21167	protein shuttle craft-like
gene21256	uncharacterized LOC113823104
gene21310	cytochrome P450 4c3-like
gene21312	uncharacterized LOC113823152
gene21341	sulfotransferase 1C4-like, transcript variant X1
gene21353	-
gene21381	facilitated trehalose transporter Tret1-like, transcript variant X2
gene21443	immediate early response gene 5 protein-like
gene2150	MAP kinase-interacting serine/threonine-protein kinase 1-like
gene21520	uncharacterized LOC113823394
gene21538	uncharacterized LOC113823415
gene21681	failed axon connections homolog
gene21791	uncharacterized LOC113823669, transcript variant X3
gene21828	aldehyde dehydrogenase X, mitochondrial-like, transcript variant X1
gene21831	facilitated trehalose transporter Tret1-like, transcript variant X1
gene21889	zinc finger and BTB domain-containing protein 17-like, transcript variant X1
gene21890	-
gene21919	transmembrane protein 53-like
gene21959	WD repeat-containing protein 76-like, transcript variant X2
gene21972	CBP80/20-dependent translation initiation factor-like
gene22036	venom carboxylesterase-6-like
gene22148	-
gene22339	uncharacterized LOC113824299
gene22469	beta-galactosidase-1-like protein 2
gene22610	kelch-like protein 8
gene22869	oplophorus-luciferin 2-monooxygenase non-catalytic subunit-like
gene22870	uncharacterized LOC113824871
gene23137	cytochrome c, transcript variant X1
gene23138	DNA-directed RNA polymerase I subunit RPA2-like
gene23157	dystrophin-like
gene23300	peritrophin-1-like
gene23393	-
gene23480	uncharacterized LOC113825541
gene23481	alpha-L-fucosidase-like, transcript variant X1
gene23622	zinc finger CCCH domain-containing protein 13-like
gene23663	-
gene23694	uncharacterized LOC113825781
gene23781	uncharacterized protein KIAA1522-like
gene23803	alpha-amylase-like
gene23805	-
gene23806	-
gene23892	mitochondrial carrier protein Rim2-like
gene24073	uncharacterized LOC113826203
gene24115	exportin-1-like
gene24205	-
gene24227	astacin-like
gene24359	ER membrane protein complex subunit 6-like
gene24638	uncharacterized LOC113826825
gene24639	high mobility group nucleosome-binding domain-containing protein 5-like
gene24674	uncharacterized LOC113826870
gene24675	uncharacterized LOC113826871
gene2472	uncharacterized LOC113827455
gene2474	cuticle protein CP1158-like
gene24899	CWF19-like protein 2
gene24952	alcohol dehydrogenase [NADP(+)]-like
gene25001	uncharacterized LOC113827224, transcript variant X1
gene25114	proton myo-inositol cotransporter-like
gene2520	TBC1 domain family member 25-like
gene2522	uncharacterized LOC113827911
gene25235	uncharacterized LOC113827495
gene25244	N-alpha-acetyltransferase daf-31-like, transcript variant X1
gene25259	peroxisomal sarcosine oxidase-like
gene25302	uncharacterized LOC113827560
gene25367	uncharacterized LOC113827644, transcript variant X2
gene25448	OTU domain-containing protein 5-B-like
gene25449	ABC transporter G family member 20-like
gene25551	sulfotransferase 1C4-like
gene25775	serine/threonine-protein kinase grp-like
gene25876	1,4-alpha-glucan-branching enzyme-like
gene25910	carbohydrate sulfotransferase 3-like, transcript variant X3
gene26001	putative gamma-glutamylcyclotransferase CG2811, transcript variant X1
gene26027	uncharacterized LOC113828375
gene26045	cystathionine beta-synthase-like, transcript variant X1
gene26195	uncharacterized LOC113828568, transcript variant X1
gene26199	uncharacterized LOC113828567
gene26216	transient receptor potential channel pyrexia-like
gene26235	uncharacterized LOC113828607
gene26287	methenyltetrahydrofolate synthase domain-containing protein-like
gene26360	uncharacterized LOC113828750
gene26367	uncharacterized LOC113828761
gene26417	stress response protein NST1-like
gene26439	uncharacterized LOC113828801
gene26477	uncharacterized LOC113828874
gene26499	dentin sialophosphoprotein-like
gene26516	sphingomyelin phosphodiesterase-like, transcript variant X1
gene26517	sphingomyelin phosphodiesterase-like
gene26518	sphingomyelin phosphodiesterase-like
gene26581	uncharacterized LOC113828982, transcript variant X1
gene26582	uncharacterized LOC113828997
gene26661	myoneurin-like, transcript variant X1
gene26817	uncharacterized LOC113829253
gene26896	vascular endothelial growth factor receptor 2-like, transcript variant X1
gene26899	alpha-(1,3)-fucosyltransferase C-like
gene26916	cAMP-dependent protein kinase catalytic subunit 3-like
gene27024	NAD kinase-like
gene27033	XK-related protein 7-like, transcript variant X1
gene27043	uncharacterized LOC113829502
gene27111	3-hydroxyisobutyrate dehydrogenase, mitochondrial-like
gene27135	mucin-17-like
gene27172	zinc metalloproteinase nas-13-like
gene27173	cytochrome b5-related protein-like, transcript variant X2
gene27192	uncharacterized LOC113829659
gene27364	uncharacterized LOC113829856
gene27425	uncharacterized LOC113829921
gene27488	uncharacterized LOC113829984
gene27584	proton channel OtopLc-like
gene2759	uncharacterized LOC113830529
gene27631	ubiquitin carboxyl-terminal hydrolase calypso-like
gene2770	uncharacterized LOC113830606, transcript variant X1
gene2772	zinc finger protein 668-like
gene27732	cuticle protein-like
gene27850	organic cation transporter protein-like
gene27886	U1 small nuclear ribonucleoprotein C-like, transcript variant X1
gene2797	tubulin--tyrosine ligase-like protein 12, transcript variant X1
gene28014	uncharacterized LOC113830582
gene28015	uncharacterized LOC113830583
gene2804	uncharacterized LOC113800306, transcript variant X1
gene28061	extensin-like
gene2812	latrophilin Cirl-like, transcript variant X1
gene28148	uncharacterized LOC113800003
gene28309	phenoloxidase-activating factor 3-like
gene28329	alcohol dehydrogenase [NADP(+)]-like
gene28336	thyroxine 5-deiodinase-like
gene28417	uncharacterized LOC113800299
gene28532	-
gene28600	uncharacterized LOC113800526, transcript variant X1
gene28653	uncharacterized LOC113800556, transcript variant X4
gene28655	pancreatic lipase-related protein 2-like
gene28727	peritrophin-1-like
gene28881	uncharacterized LOC113800831
gene28883	mucin-17-like
gene28884	kynurenine/alpha-aminoadipate aminotransferase, mitochondrial-like
gene28909	rhomboid-related protein 1-like
gene28922	laccase-like
gene28990	low-density lipoprotein receptor 1-like
gene29018	-
gene29047	triosephosphate isomerase B-like
gene29178	uncharacterized LOC113801134
gene29239	protein jagunal-like
gene29282	acylcarnitine hydrolase-like
gene295	uncharacterized LOC113829414
gene2965	vitelline membrane outer layer protein 1-like
gene29883	protein odd-skipped-related 2-like, transcript variant X1
gene30054	uncharacterized LOC113802112
gene30069	uncharacterized LOC113802128, transcript variant X1
gene30125	failed axon connections homolog
gene30153	hsp70-binding protein 1-like
gene30198	-
gene30199	-
gene30275	F-BAR domain only protein 2-like
gene3035	PR domain zinc finger protein 10-like, transcript variant X1
gene30407	uncharacterized LOC113802506
gene30556	solute carrier family 22 member 6-B-like
gene30657	venom protein 302-like
gene3089	uncharacterized LOC113802925, transcript variant X1
gene3090	uncharacterized LOC113802927
gene3147	serine/threonine-protein kinase unc-51-like
gene3170	serine/threonine-protein phosphatase 6 regulatory ankyrin repeat subunit A-like
gene3171	uncharacterized LOC113803018
gene3358	sodium- and chloride-dependent GABA transporter 2-like
gene3428	uncharacterized LOC113803301
gene3476	-
gene3516	charged multivesicular body protein 7-like
gene352	carbonic anhydrase-like, transcript variant X1
gene3750	solute carrier organic anion transporter family member 3A1-like
gene3768	uncharacterized LOC113803663
gene3809	uncharacterized LOC113803706
gene389	histone acetyltransferase p300-like, transcript variant X2
gene39	mucin-2-like
gene4029	guanidinobutyrase-like
gene4034	uncharacterized LOC113803963
gene4128	calcium-activated chloride channel regulator 1-like
gene4167	perlucin-like protein
gene429	histone-lysine N-methyltransferase 2C-like
gene431	uncharacterized LOC113804027
gene4357	uncharacterized LOC113804355
gene4472	carboxypeptidase Q-like
gene4551	trafficking protein particle complex subunit 6B-like
gene4606	4-coumarate--CoA ligase 1-like
gene4622	-
gene4687	uncharacterized LOC113804706, transcript variant X1
gene474	uncharacterized LOC113804491
gene4845	diamine acetyltransferase 2-like
gene4876	transcriptional coactivator YAP1-like, transcript variant X1
gene494	uncharacterized LOC113804675
gene496	probable 4-coumarate--CoA ligase 1, transcript variant X3
gene5051	uncharacterized LOC113805108, transcript variant X1
gene5222	heat shock 70 kDa protein cognate 4-like
gene5249	probable alpha-ketoglutarate-dependent hypophosphite dioxygenase, transcript variant X2
gene5342	probable cytochrome P450 49a1
gene5369	myosin regulatory light chain 2-like
gene5378	nicotinamide phosphoribosyltransferase-like
gene5486	SET domain-containing protein SmydA-8-like
gene549	group XV phospholipase A2-like
gene5537	-
gene5566	uncharacterized LOC113805690
gene566	uncharacterized LOC113805412
gene570	uncharacterized LOC113805452
gene5801	uncharacterized LOC113805974
gene5815	-
gene5818	flocculation protein FLO11-like
gene5835	dipeptidase 1-like
gene5874	uncharacterized LOC113806039
gene5879	heat shock protein 83-like
gene5880	heat shock protein HSP 90-alpha, transcript variant X1
gene6150	uncharacterized LOC113806347
gene6156	acetyltransferase plu1384-like
gene6157	uncharacterized LOC113806360
gene6158	uncharacterized LOC113806361
gene6183	cryptochrome DASH-like, transcript variant X1
gene6242	heme-binding protein 1-like, transcript variant X2
gene6429	uncharacterized LOC113806638
gene6463	GDNF-inducible zinc finger protein 1-like
gene6603	-
gene6636	cuticle protein 7-like
gene6812	uncharacterized LOC113807076
gene6832	remodeling and spacing factor 1-like
gene6901	cholinesterase 2-like
gene6946	beta-1,3-glucan-binding protein-like
gene6947	beta-1,3-glucan-binding protein-like
gene6979	translation initiation factor IF-2-like
gene6997	uncharacterized LOC113807282, transcript variant X2
gene7005	uncharacterized LOC113807290
gene7165	uncharacterized LOC113807441, transcript variant X2
gene7217	carboxypeptidase B-like
gene725	sodium-independent sulfate anion transporter-like
gene7307	uncharacterized LOC113807627
gene7375	cytochrome P450 2L1-like
gene7376	cytochrome P450 2L1-like
gene7378	cytochrome P450 2L1-like, transcript variant X2
gene7412	RING finger protein 224-like
gene7507	cytochrome P450 3A13-like
gene761	uncharacterized LOC113807570
gene762	peritrophin-44-like
gene7838	abhydrolase domain-containing protein 2-like
gene7839	uncharacterized LOC113808211
gene7850	uncharacterized LOC113808222
gene7893	-
gene7906	homeotic protein spalt-major-like, transcript variant X2
gene796	estrogen sulfotransferase-like, transcript variant X1
gene8038	uncharacterized LOC113808400
gene806	mucin-5AC-like, transcript variant X1
gene8146	uncharacterized LOC113808548
gene8147	5E5 antigen-like
gene8148	2-hydroxyacylsphingosine 1-beta-galactosyltransferase-like
gene8246	vitelline membrane outer layer protein 1 homolog, transcript variant X1
gene8366	-
gene8396	kielin/chordin-like protein
gene8425	uncharacterized LOC113808863
gene8491	uncharacterized LOC113808913
gene8528	uncharacterized LOC113808957
gene8701	uncharacterized LOC113809163, transcript variant X1
gene8713	uncharacterized LOC113809174, transcript variant X1
gene8821	uncharacterized LOC113809290
gene8859	zinc metalloproteinase nas-14-like
gene8883	L-asparaginase 1-like, transcript variant X1
gene8906	membralin-like
gene894	pyrethroid hydrolase Ces2a-like
gene895	liver carboxylesterase 2-like
gene8976	inactive hydroxysteroid dehydrogenase-like protein 1, transcript variant X1
gene8982	flavin-containing monooxygenase FMO GS-OX5-like, transcript variant X1
gene9105	hematopoietic prostaglandin D synthase-like
gene9171	UDP-glucuronosyltransferase 2B16-like
gene9192	protein Lilipod-like
gene9544	-
gene9898	uncharacterized LOC113810479
gene995	protein disabled-like
